# Supplementary material
Source: PubMed Central journal article supplement (PMC2417182)
Supplement: jbc_M708615200_1.pdf [file jbc_M708615200_1.pdf]

Supplemental Figure 1.

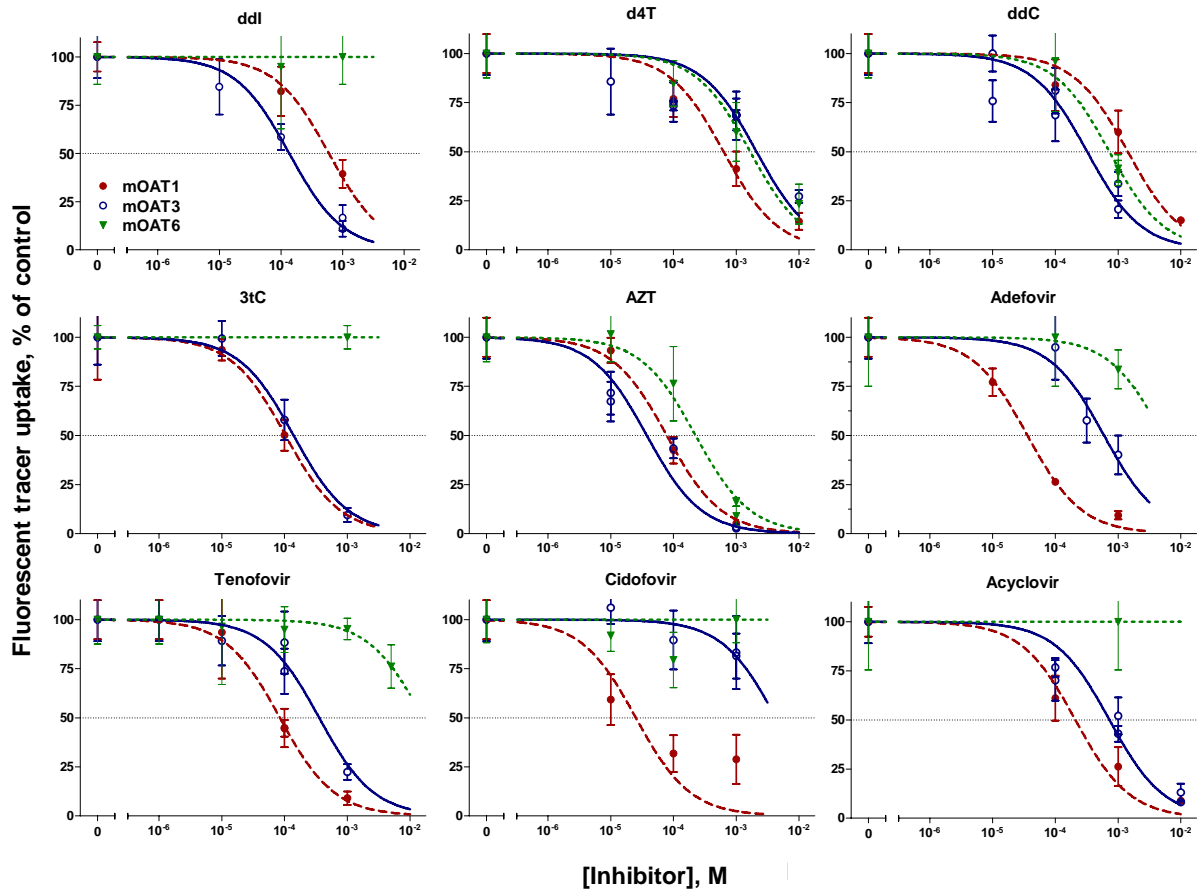

Supplemental Figure 2.

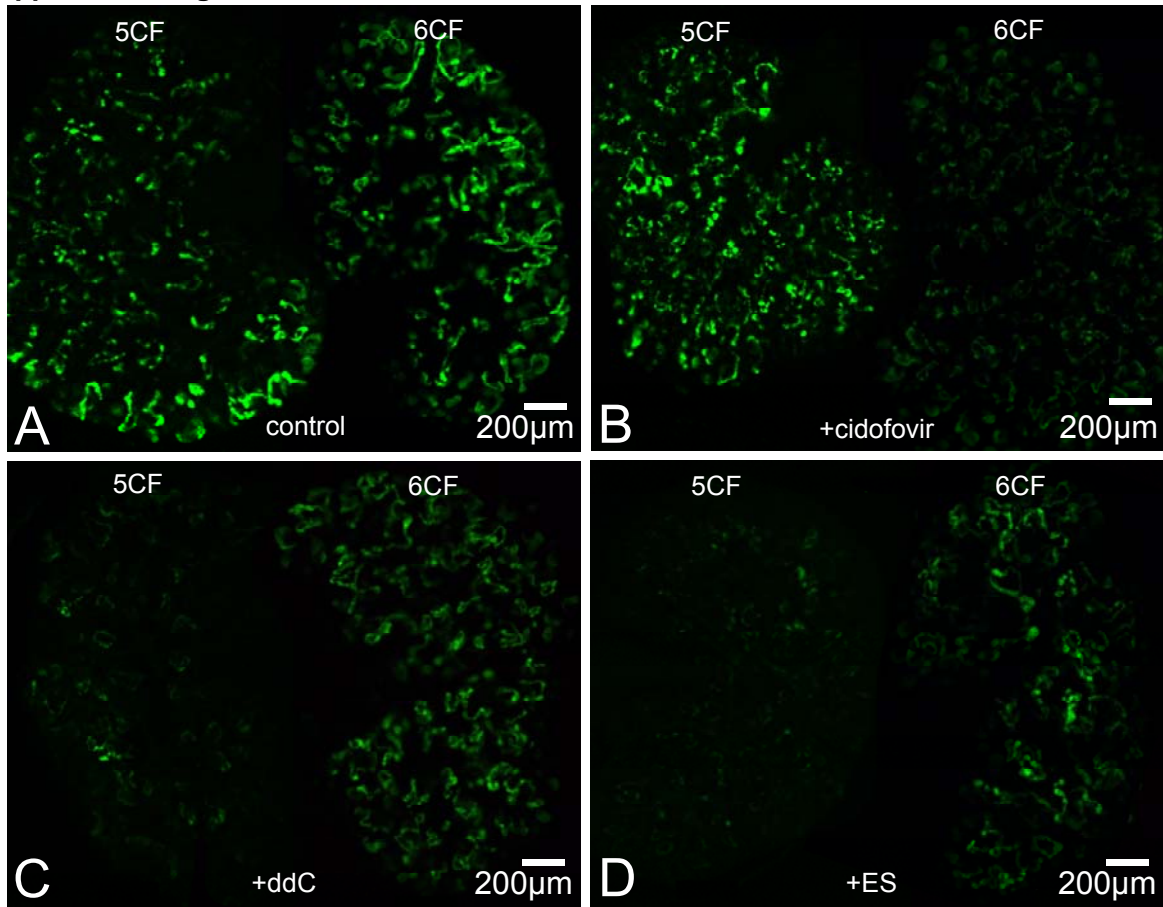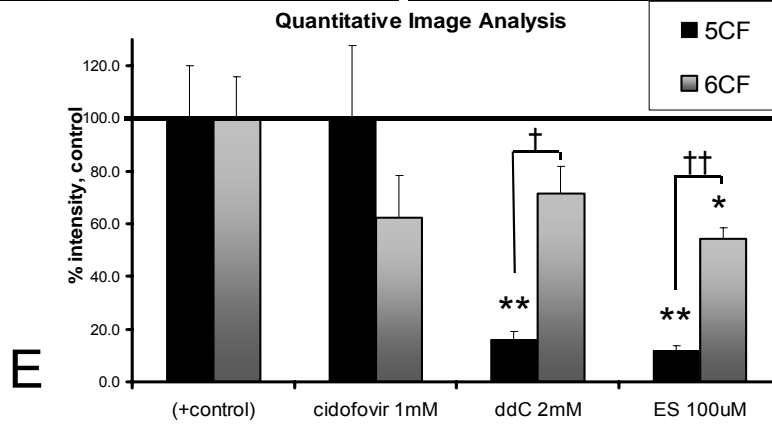

Supplemental Figure 3.

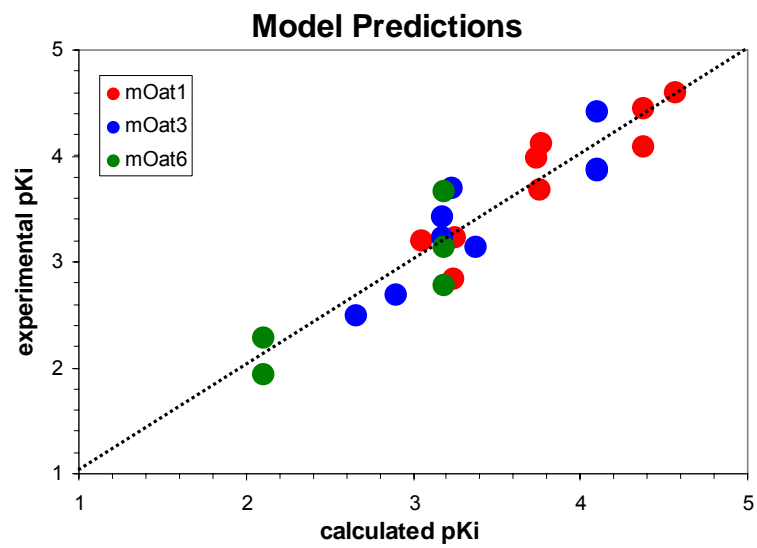

**Supplemental Fig. 1.** *Inhibition of fluorescent tracer uptake by various antivirals.* The affinity of antivirals for three Oats were determined using fluorescent tracers identified in Table 1. Each value is the percent inhibition of the control uptake (mean  $\pm$  SEM, n=4) from one to two experiments. Curves were fit using nonlinear regression and affinity values are presented in Table 2.

**Supplemental Fig. 2.** *Differential Oat affinity for 5CF vs. 6CF in wildtype WEK.* Left of panel: 5CF; Right of panel: 6CF. **A.** Control WT WEK uptake. **B.** WT WEKs +1 mM Cidofovir. **C.** WT WEKs +2 mM ddC. **D.** WT WEKs +100  $\mu$ M ES. **E.** Quantitative Image Analysis. The images are shown as comparative inhibitor effects on 5CF or 6CF uptake in WEK (which contain all Oat isoforms). There is a distinct inhibitory profile similar to Oat1<sup>-/-</sup> (Fig. 6), while 6CF appears to be a mix of both profiles, Oat1<sup>-/-</sup> + Oat3<sup>-/-</sup> (Fig. 5, 6). All images are representative of triplicate WEKs from the same experiment and pregnant female. \* $p$ <0.05, \*\*  $p$ <0.01, †  $p$ <0.01, ††  $p$ <0.001

**Supplemental Fig. 3.** *Experimental vs calculated  $pK_i$  plot of Oats.* Models of antiviral binding to *mOat1*, *mOat3*, and *mOat6* were built using multiple linear regression of physicochemical properties. The models were used to predict the binding affinity (-logIC<sub>50</sub> value; approximate  $pK_i$  value). Values are shown here from Table 3 as a ratio of calculated (predicted)  $pK_i$  to the experimental  $pK_i$  values obtained in Table 2. The calculated values efficiently predict binding affinity, and thus suggest the models are relevant.
